# Supplementary material
Source: HighWire-hosted journal article supplement (https://erj.ersjournals.com/content/56/2/2001377)
Supplement: inline-supplementary-material-1 [file inline-supplementary-material-1.pdf]

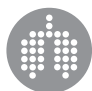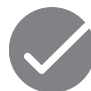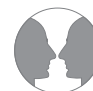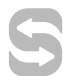

SHAREABLE PDF

# Added value of chest computed tomography in suspected COVID-19: an analysis of 239 patients

Daniël A. Korevaar<sup>1</sup>, Ruud S. Kootte<sup>2</sup>, Loek P. Smits<sup>2</sup>, Joost G. van den Aardweg<sup>1</sup>, Peter I. Bonta<sup>1</sup>, Janke Schinkel<sup>3</sup>, René M. Vigeveno<sup>3</sup>, Inge A.H. van den Berk<sup>4</sup>, Maeke J. Scheerder<sup>4</sup>, Bregtje A. Lemkes<sup>5</sup>, Abraham Goorhuis<sup>5</sup>, Ludo F.M. Beenen<sup>4</sup> and Jouke T. Annema<sup>1</sup> and on behalf of the Amsterdam UMC location AMC COVID-19 group<sup>6</sup>

**Affiliations:** <sup>1</sup>Dept of Respiratory Medicine, Amsterdam University Medical Centres, University of Amsterdam, Amsterdam, the Netherlands. <sup>2</sup>Dept of Internal Medicine, Amsterdam University Medical Centres, University of Amsterdam, Amsterdam, the Netherlands. <sup>3</sup>Dept of Medical Microbiology and Infection Prevention, Amsterdam University Medical Centres, University of Amsterdam, Amsterdam, the Netherlands. <sup>4</sup>Dept of Radiology, Amsterdam University Medical Centres, University of Amsterdam, Amsterdam, the Netherlands. <sup>5</sup>Dept of Infectious Diseases, Amsterdam University Medical Centres, University of Amsterdam, Amsterdam, the Netherlands. <sup>6</sup>All collaborators in the "Amsterdam UMC location AMC COVID-19 group" are listed in the acknowledgements section.

**Correspondence:** Daniël A. Korevaar, Dept of Respiratory Medicine, Amsterdam University Medical Centres, University of Amsterdam, Meibergdreef 9, 1105 AZ Amsterdam, the Netherlands. E-mail: d.a.korevaar@amsterdamumc.nl

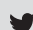

@ERSpublications

**In a high-prevalence emergency department setting, chest CT showed a high probability of COVID-19 in 30% of patients with a negative or indeterminate initial RT-PCR result** <https://bit.ly/38hLDzR>

**Cite this article as:** Korevaar DA, Kootte RS, Smits LP, *et al.* Added value of chest computed tomography in suspected COVID-19: an analysis of 239 patients. *Eur Respir J* 2020; 56: 2001377 [https://doi.org/10.1183/13993003.01377-2020].

This single-page version can be shared freely online.

## To the Editor:

Since the outbreak of the coronavirus disease 2019 (COVID-19) pandemic, clinicians have been struggling with the optimal diagnostic approach of suspected patients. Real-time reverse transcriptase-polymerase chain reaction (RT-PCR) testing of respiratory samples is generally being considered as the reference standard for establishing severe acute respiratory syndrome coronavirus 2 (SARS-CoV-2) infection [1]. However, RT-PCR results take hours to become available and, although highly specific, sensitivity is moderate [2–4]. This could result in delayed and suboptimal clinical decision making.
